# Supplementary material for: The Effects of Codon Context on In Vivo Translation Speed
Source: PubMed Central journal article supplement (PMC4046918; doi:10.1371/journal.pgen.1004392), 2014-06-05
Supplement: pgen.1004392.s001.pdf [file pgen.1004392.s001.pdf]

Supporting Information Figure S1.

**A.**

|                                  |            | Second position of codon |            |            |            |   |
|----------------------------------|------------|--------------------------|------------|------------|------------|---|
|                                  |            | U                        | C          | A          | G          |   |
| First position of codon (5' end) | U          | 24.3 ± 1.7               | 21.0 ± 2.7 | 31.0 ± 3.2 | 48.1 ± 4.5 | U |
|                                  |            | 22.5 ± 1.1               | 22.7 ± 3.5 | 24.8 ± 3.1 | 21.8 ± 0.8 | C |
|                                  |            | 18.1 ± 0.9               | 15.1 ± 1.4 | 276 ± 20   | 259 ± 12   | A |
|                                  |            | 16.9 ± 0.5               | 17.0 ± 0.2 | 292 ± 28   | 26.2 ± 4.7 | G |
| C                                | 25.3 ± 0.8 | 27.4 ± 3.7               | 18.4 ± 1.0 | 87.1 ± 5.1 | U          |   |
|                                  | 23.6 ± 1.7 | 36.5 ± 1.6               | 11.4 ± 2.1 | 19.0 ± 1.0 | C          |   |
|                                  | 17.7 ± 1.3 | 18.2 ± 1.8               | 16.5 ± 1.3 | 80.1 ± 12  | A          |   |
|                                  | 10.7 ± 0.5 | 16.6 ± 1.8               | 11.3 ± 1.4 | 45.5 ± 1.0 | G          |   |
| A                                | 19.9 ± 1.0 | 11.8 ± 1.6               | 20.7 ± 2.8 | 74.1 ± 3.6 | U          |   |
|                                  | 17.3 ± 1.5 | 12.9 ± 2.4               | 14.9 ± 3.3 | 15.3 ± 1.9 | C          |   |
|                                  | 31.7 ± 1.4 | 9.6 ± 1.9                | 14.0 ± 2.0 | 55.0 ± 3.6 | A          |   |
|                                  | 11.5 ± 3.6 | 9.1 ± 2.3                | 13.3 ± 2.1 | 102 ± 15   | G          |   |
| G                                | 20.0 ± 1.3 | 12.4 ± 1.5               | 25.7 ± 1.3 | 56.9 ± 1.5 | U          |   |
|                                  | 19.5 ± 0.7 | 10.7 ± 1.0               | 16.5 ± 1.2 | 18.6 ± 0.8 | C          |   |
|                                  | 12.2 ± 1.4 | 8.0 ± 0.9                | 19.0 ± 1.1 | 23.0 ± 0.4 | A          |   |
|                                  | 14.2 ± 2.3 | 8.1 ± 0.8                | 21.5 ± 1.5 | 21.8 ± 0.9 | G          |   |

Third position of codon (3' end)

**B.**

|      |     | His5   |       |        |        |          |
|------|-----|--------|-------|--------|--------|----------|
|      |     | CCU    | CCC   | CCA    | CCG    | CAC      |
| His4 | CCU | 354±24 | 340±5 | 350±16 | 344±5  | —        |
|      | CCC | 363±6  | 372±2 | 344±21 | 341±21 | —        |
|      | CCA | 355±13 | 345±7 | 348±16 | 339±26 | —        |
|      | CCG | 318±10 | 325±3 | 262±13 | 266±1  | —        |
|      | CAU | —      | —     | —      | —      | 11.0±0.3 |
