# Supplementary material for: The Effects of Codon Context on In Vivo Translation Speed
Source: PubMed Central journal article supplement (PMC4046918; doi:10.1371/journal.pgen.1004392), 2014-06-05
Supplement: pgen.1004392.s002.pdf [file pgen.1004392.s002.pdf]

## Supporting information Table S1- List of primers

| Name                  | Sequence                                                                                                                           |
|-----------------------|------------------------------------------------------------------------------------------------------------------------------------|
| His7tetR              | tat gac acg cgt tca att taa aca cca cca tca tca cca ttt aag acc cac ttt cac att                                                    |
| His7tetA              | ctg aat gtc ttc cag cac aca tcg cct gaa aga cta gtc agg cta agc act tgt ctc ctg                                                    |
| hisOHis1stop          | gca ttc atc gga att ttt atg aca cgc gtt caa ttt aaa <b>tag</b> cac cat cat cac cat cat                                             |
| hisOGHis2stop         | ttc atc gga att ttt atg aca cgc gtt caa ttt aaa cac <b>tag</b> cat cat cac cat cat cct                                             |
| hisOGHis3stop         | atc gga att ttt atg aca cgt gtt caa ttt aaa cac cac <b>tag</b> cat cac cat cat cct gac                                             |
| hisOGHis4stop         | gga att ttt atg aca cgc gtt caa ttt aaa cac cac cat <b>tag</b> cac cat cat cct gac tag                                             |
| hisOGHis5stop         | att ttt atg aca cgc gtt caa ttt aaa cac cac cat cat <b>tag</b> cat cat cct gac tag tct                                             |
| hisOGHis6stop         | ttt atg aca cgc gtt caa ttt aaa cac cac cat cat cac <b>tag</b> cat cct gac tag tct ttc                                             |
| hisOGHis7stop         | atg aca cgc gtt caa ttt aaa cac cac cat cat cac cat <b>tag</b> cct gac tag tct ttc agg                                             |
| hisOrev               | tct gaa cgc gtc tgt atc                                                                                                            |
| hisOGHis5NNNfwdfill   | c gga att ttt atg aca cgc gtt caa ttt aaa cac cac cat cat <b>nnn</b> cat cat cct gac tag<br>tct ttc agg cga tgt gtg ctg gaa gac a  |
| His5contextfillinrev  | tgtctccagcacacatcg                                                                                                                 |
| NNNHis5TCAfwd         | c gga att ttt atg aca cgc gtt caa ttt aaa cac cac cat <b>nnn tca</b> cat cat cct gac tag<br>tct ttc agg cga tgt gtg ctg gaa gac a  |
| His4TCANNNfwd         | c gga att ttt at g aca cgc gtt caa ttt aaa cac cac cat <b>tca nnn</b> cat cat cct gac<br>tag tct ttc agg cga tgt gtg ctg gaa gac a |
| His4-5CNN-CNN         | c gga att ttt atg aca cgc gtt caa ttt aaa cac cac cat <b>ccn ccn</b> cat cat cct gac tag<br>tct ttc agg cga tgt gtg ctg gaa gac a  |
| His4-5CGN-AG(AG)      | cgg aat ttt tat gac acg cgt tca att taa a cac cac cat CGN AGR cat ca t cct<br>gacta gtc ttt cag gcg atg tgt gct gga aga ca         |
| His4-5AG(AG)-CGN      | cgg aat ttt tat gac acg cgt tca att taa a cac cac cat AGR CGN cat ca t cct<br>gacta gtc ttt cag gcg atg tgt gct gga aga ca         |
| His4-5CGN-CGN         | cgg aat ttt tat gac acg cgt tca att taa a cac cac cat CGN CGNcat ca t cct<br>gacta gtc ttt cag gcg atg tgt gct gga aga ca          |
| His4-5AG(AG)-AG(AG)   | cgg aat ttt tat gac acg cgt tca att taa a cac cac cat AGR AGR cat ca t cct<br>gacta gtc ttt cag gcg atg tgt gct gga aga ca         |
| -35hispromtetR        | act gac aat tca tac tat aaa tgc gaa atg aaa aaa gcg c TTA AGA CCC ACT<br>TTC ACA TT                                                |
| -10hispromtetA        | tca taa aaa ttc cga tga atg ctt att cat ttg ata cct ttt CTA AGC ACT TGT<br>CTC CTG                                                 |
| 10histetAhisPfw       | att ttt gtt gac act cta tca ttg ata gag tta ttt tac ca GGTA TCA AAT GAA<br>TAA                                                     |
| hisrevprom            | gtg ttt aaa ttg aac gcg tg                                                                                                         |
| His4-5 C/A/G NN       | c gga att ttt atg aca cgc gtt caa ttt aaa cac cac cat <b>VNN VNN</b> cat cat cct gac<br>tag tct ttc agg cga tgt gtg ctg gaa gac a  |
| His4,5-GlyGly GGA-GGU | cgg aat ttt tat gac acg cgt tca att taaa cac cac cat <b>gga ggt</b> cat cat cct gac tag<br>tct ttc agg cga tgt gtg ctg gaa gac a   |
| His4,5-GlyGly GGU-GGA | cgg aat ttt tat gac acg cgt tca att taaa cac cac cat <b>ggt gga</b> cat cat cct gac tag<br>tct ttc agg cga tgt gtg ctg gaa g ac a  |
| His4,5-GlyGly GGC-GGC | cgg aat ttt tat gac acg cgt tca att taaa cac cac cat <b>ggc ggc</b> cat cat cct gac tag<br>tct ttc agg cga tgt gtg ctg gaa g ac a  |
| His4,5-GlyGly GGA-GGA | cgg aat ttt tat gac acg cgt tca att taaa cac cac cat <b>gga gga</b> cat cat cct gac tag<br>tct ttc agg cga tgt gtg ctg gaa g ac a  |

## Supporting information Table S1- List of primers, *continued*

---

| Name                  | Sequence                                                                                                                                       |
|-----------------------|------------------------------------------------------------------------------------------------------------------------------------------------|
| His4,5-GlyGly GGU-GGU | cgg aat ttt tat gac acg cgt tca att taaa cac cac cat <b>ggt ggt</b> cat cat cct gac tag<br>tct ttc agg cga tgt gtg ctg gaa g ac a              |
| His1,2-perfectSD      | a gca ttc at cgg aat ttt tat gac acg cgt tca att taa a <b>gga ggu gca</b> cat cac cat cat<br>cct gac tag tct ttc agg cga tgt gtg ctg gaa gac a |
| hisG-multiRT-fw       | gaa aac atg ccg att gat atc ctg                                                                                                                |
| hisG-multiRT-rv       | agc acg tttt cgc cga taa tac                                                                                                                   |
| rpoA-RT-fw            | cgc cct gtt gac gat ctg g                                                                                                                      |
| rpoA-RT-rv            | ttt acc caa gtt agg cgt ctt aag                                                                                                                |
| gyrB-RT-fw            | ctg ctc aaa gag ctg gtg tat ca                                                                                                                 |
| gyrB-RT-rv            | agc gcg tta cag tct gct cat                                                                                                                    |

---
